# Supplementary material for: Nuclear Receptor DHR4 Controls the Timing of Steroid Hormone Pulses During Drosophila Development
Source: PLOS journal article supplement (doi:10.1371/journal.pbio.1001160), 2011-09-27

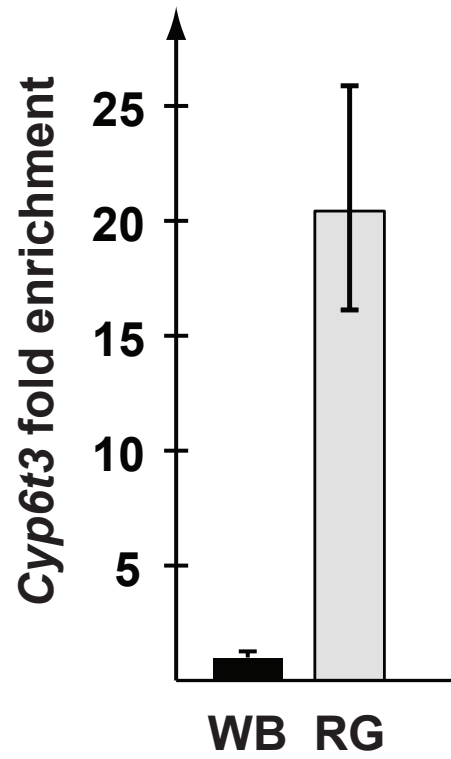

Supplement: S4 (10.1371/journal.pbio.1001160.s004) [file journal.pbio.1001160.s004]
